# Supplementary material
Source: PubMed Central journal article supplement (PMC7094022)
Supplement: advancesADV2019001126-suppl1.pdf [file advancesADV2019001126-suppl1.pdf]

**Supplemental Table 1. Subsequent neoplasms reported after HCT**

| <b>Subsequent Neoplasm</b>                                                                                                                               | <b>TBI</b> | <b>Chemotherapy</b> |
|----------------------------------------------------------------------------------------------------------------------------------------------------------|------------|---------------------|
| Other leukemia                                                                                                                                           | 0          | 1                   |
| Genitourinary malignancy                                                                                                                                 | 0          | 1                   |
| Lung cancer                                                                                                                                              | 0          | 1                   |
| Melanoma                                                                                                                                                 | 1          | 0                   |
| Other skin malignancy                                                                                                                                    | 3          | 4                   |
| Oropharyngeal cancer                                                                                                                                     | 2          | 1                   |
| Sarcoma                                                                                                                                                  | 2          | 0                   |
| Not confirmed by path report: Genitourinary malignancy; Oropharyngeal cancer, TBI (N=1); Other leukemia; Other skin malignancy, TBI (N=1), non-TBI (N=2) |            |                     |
| HCT, allogeneic hematopoietic cell transplantation; TBI, total body irradiation                                                                          |            |                     |

**Supplemental Table 2. Cumulative incidence of late effects at 10 years after HCT by age**

| <b>Late effect</b>                                                                  | <b><u>15-19 years</u></b> |                      | <b><u>20-29 years</u></b> |                      | <b><u>30-39 years</u></b> |                      | <b>P*</b> |
|-------------------------------------------------------------------------------------|---------------------------|----------------------|---------------------------|----------------------|---------------------------|----------------------|-----------|
|                                                                                     | <b>N</b>                  | <b>Prob (95% CI)</b> | <b>N</b>                  | <b>Prob (95% CI)</b> | <b>N</b>                  | <b>Prob (95% CI)</b> |           |
| Subsequent neoplasm                                                                 | 127                       | 0.8 (0-3.1)%         | 321                       | 3.9 (1.2-8.1)%       | 370                       | 4.5 (1.5-9)%         | 0.07      |
| Avascular necrosis                                                                  | 120                       | 4.7 (1.5-9.5)%       | 307                       | 9.9 (6.5-13.9)%      | 363                       | 6.9 (3.4-11.4)%      | 0.16      |
| Cataracts                                                                           | 124                       | 7.3 (1.6-16.6)%      | 316                       | 9.3 (5.5-14.1)%      | 371                       | 11.4 (7.2-16.4)%     | 0.63      |
| Diabetes mellitus                                                                   | 105                       | 1.9 (0.2-5.4)%       | 250                       | 5.5 (2-10.6)%        | 299                       | 4.4 (2-7.7)%         | 0.26      |
| Hypothyroidism                                                                      | 115                       | 16.7 (8.1-27.6)%     | 307                       | 9.7 (6.3-13.8)%      | 362                       | 8.9 (5.6-12.8)%      | 0.34      |
| Gonadal dysfunction                                                                 | 112                       | 3 (0.6-7.3)%         | 311                       | 3.5 (1.2-6.8)%       | 365                       | 3.3 (1.3-6.2)%       | 0.97      |
| * P value for comparison of 15-19 years vs. 20-29 years vs. 30-39 years at 10 years |                           |                      |                           |                      |                           |                      |           |
| HCT, allogeneic hematopoietic cell transplantation                                  |                           |                      |                           |                      |                           |                      |           |

**Supplemental Table 3. Causes of death among AYA survivors with subsequent neoplasms (N=16)**

|                            | <b>N (%)</b> |
|----------------------------|--------------|
| <b>Subsequent neoplasm</b> | <b>16</b>    |
| Alive                      | 9 (56)       |
| Dead                       | 7 (44)       |
| Primary Disease            | 1            |
| GVHD                       | 1            |
| Organ failure              | 1            |
| Subsequent neoplasm        | 1            |
| Other cause*               | 1            |
| Unknown                    | 2            |

AYA, adolescent and young adults; GVHD, graft-versus-host disease

**Supplemental Table 4. Prevalence of non-malignant late effects in AYAs with AML surviving at least 1-year disease-free following ablative HCT**

| <b>Late Effect</b>                           | <b>All Patients<br/>(N=826)</b> | <b>TBI<br/>(N=390)</b> | <b>Chemotherapy-only<br/>(N=436)</b> |
|----------------------------------------------|---------------------------------|------------------------|--------------------------------------|
| Gonadal dysfunction                          | 61 (7%)                         | 30 (8%)                | 31 (7%)                              |
| Avascular necrosis                           | 48 (6%)                         | 28 (7%)                | 20 (5%)                              |
| Cataracts                                    | 51 (6%)                         | 42 (11%)               | 9 (2%)                               |
| Diabetes mellitus                            | 20 (2%)                         | 13 (3%)                | 7 (2%)                               |
| Hypothyroidism                               | 18 (2%)                         | 11 (3%)                | 7 (2%)                               |
| Dialysis                                     | 15 (2%)                         | 12 (3%)                | 3 (<1%)                              |
| Stroke/seizures                              | 12 (1%)                         | 11 (3%)                | 1 (<1%)                              |
| Congestive heart failure                     | 4 (<1%)                         | 2 (<1%)                | 2 (<1%)                              |
| Myocardial infarct                           | 4 (<1%)                         | 1 (<1%)                | 3 (<1%)                              |
| Pancreatitis                                 | 4 (<1%)                         | 4 (1%)                 | 0                                    |
| Number of late effects reported per patient* |                                 |                        |                                      |
| 0                                            | 643 (78)                        | 270 (69)               | 373 (86)                             |
| 1                                            | 139 (17)                        | 87 (22)                | 52 (12)                              |
| 2+                                           | 40 (5)                          | 29 (7)                 | 11 (2)                               |

\* Only includes late effects listed in this table  
 AYAs, adolescent and young adults; AML, acute myeloid leukemia; HCT, allogeneic hematopoietic cell transplantation; TBI, total body irradiation
